## CORRECTION

# Correction: Intraperitoneal administration of follistatin promotes adipocyte browning in high-fat diet-induced obese mice

Haoyu Li, Chuanhai Zhang, Junyu Liu, Wenya Xie, Wentao Xu, Fei Liang, Kunlun Huang, Xiaoyun He

The authors acknowledge the following incorrectly duplicated references:

Reference [3] also appears as reference [31]. The reference is: Nedergaard J, Bengtsson T, Cannon B. New Powers of Brown Fat: Fighting the Metabolic Syndrome. *Cell Metabolism*. 2011;13(3):238–40.

Reference [9] also appears as references [16] and [26]. The reference is: Singh R, Braga M, Reddy ST, Lee SJ, Parveen M, Grijalva V, et al. Follistatin targets distinct pathways to promote brown adipocyte characteristics in brown and white adipose tissues. *Endocrinology*. 2017;158(5):1217–30.

Reference [12] also appears as reference [24]. The reference is: Shan T, Liang X, Bi P, Kuang S. Myostatin knockout drives browning of white adipose tissue through activating the AMPK-PGC1 $\alpha$ -Fndc5 pathway in muscle. *The FASEB Journal*. 2013;27(5):1981–9.

Reference [11] also appears as reference [35]. The reference is: Braga M, Pervin S, Norris K, Bhasin S, Singh R. Inhibition of in vitro and in vivo brown fat differentiation program by myostatin. *Obesity*. 2013;21(6):1180–8.

Reference [15] also appears as reference [20]. The reference is: Braga M, Reddy ST, Vergnes L, Pervin S, Grijalva V, Stout D, et al. Follistatin promotes adipocyte differentiation, browning, and energy metabolism. *Journal of Lipid Research*. 2014;55(3):375–84.

Reference [17] also appears as references [25] and [33]. The reference is: Boström P, Wu J, Jedrychowski MP, Korde A, Ye L, Lo JC, et al. A PGC1- $\alpha$ -dependent myokine that drives brown-fat-like development of white fat and thermogenesis. *Nature*. 2012;481(7382):463–8.

Reference [18] also appears as reference [37]. The reference is: Arturo RR, Cecilia C, Senin LL, Landrove MO, Javier B, Ana BC, et al. FNDC5/irisin is not only a myokine but also an adipokine. *Plos One*. 2013;8(4):e60563.

In addition, there are typographical errors in the following references:

In reference [17], “ $\alpha$ ” incorrectly appears as “[agr].” The correct reference is: The reference is: Boström P, Wu J, Jedrychowski MP, Korde A, Ye L, Lo JC, et al. A PGC1- $\alpha$ -dependent myokine that drives brown-fat-like development of white fat and thermogenesis. *Nature*. 2012;481(7382):463–8.

In reference [19], “SAT-123” incorrectly appears as “SAT-123-SAT-.” The correct reference is: Triantafyllou GA, Skouvaklidou EC, Saridakis ZG, Kynigopoulos G, Dima DI, Apostolou A, et al. Circulating Follistatin and Irisin in Young, Healthy Individuals: A One-Year Prospective Cohort Study. GPCRs, Growth Factors, Tyrosine Kinases, Inhibits, Activins, and TGF Beta Superfamily (posters): Endocrine Society; 2016. p. SAT-123.

In reference [25], “brown-fat-like development” incorrectly appears as “browning.” The correct reference is: Boström P, Wu J, Jedrychowski MP, Korde A, Ye L, Lo JC, et al.

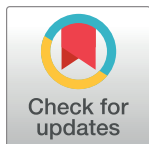

## OPEN ACCESS

**Citation:** Li H, Zhang C, Liu J, Xie W, Xu W, Liang F, et al. (2019) Correction: Intraperitoneal administration of follistatin promotes adipocyte browning in high-fat diet-induced obese mice. *PLoS ONE* 14(12): e0226344. <https://doi.org/10.1371/journal.pone.0226344>

**Published:** December 5, 2019

**Copyright:** © 2019 Li et al. This is an open access article distributed under the terms of the [Creative Commons Attribution License](https://creativecommons.org/licenses/by/4.0/), which permits unrestricted use, distribution, and reproduction in any medium, provided the original author and source are credited.

A PGC1- $\alpha$ -dependent myokine that drives brown-fat-like development of white fat and thermogenesis. *Nature*. 2012;481(7382):463–8.

Reference [33] contains multiple errors. “Boström” incorrectly appears as “Bosträ M.” “PGC1- $\alpha$ -dependent” should appear as “PGC1- $\alpha$ -dependent.” The correct reference is: Boström P, Wu J, Jedrychowski MP, Korde A, Ye L, Lo JC, et al. A PGC1- $\alpha$ -dependent myokine that drives brown-fat-like development of white fat and thermogenesis. *Nature*. 2012;481(7382):463–8.

In reference [35], “of in vitro and in vivo brown” should appear as “of in vitro and in vivo brown.” The correct reference is: Braga M, Pervin S, Norris K, Bhasin S, Singh R. Inhibition of in vitro and in vivo brown fat differentiation program by myostatin. *Obesity*. 2013;21(6):1180–8.

## Reference

1. Li H, Zhang C, Liu J, Xie W, Xu W, Liang F, et al. (2019) Intraperitoneal administration of follistatin promotes adipocyte browning in high-fat diet-induced obese mice. *PLoS ONE* 14(7): e0220310. <https://doi.org/10.1371/journal.pone.0220310> PMID: 31365569
